# Supplementary material for: Constraining the timing and processes of pediment formation and dissection: implications for long-term evolution in the Western Cape, South Africa
Source: Copernicus journal article supplement (doi:10.5194/esurf-13-315-2025), 2025-04-29
Supplement: Supplementary file 1 [file esurf-13-315-2025-supplement.zip]

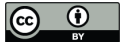

*Supplement of*

## **Constraining the timing and processes of pediment formation and dissection: implications for long-term evolution in the Western Cape, South Africa**

**Janet C. Richardson et al.**

*Correspondence to:* Janet C. Richardson ([janet.richardson@edgehill.ac.uk](mailto:janet.richardson@edgehill.ac.uk))

- [esurf-13-315-2025-supplement-title-page.pdf](#)
- [CRN\\_SAfrica\\_Suppltable.xlsx](#)

The copyright of individual parts of the supplement might differ from the article licence.
